# Supplementary material for: Accidental Left Circumflex Artery to Right Lung Fistula in a Suspected Case of Pulmonary Hypertension
Source: Case Rep Cardiol. 2014 Jul 17;2014:427045. doi: 10.1155/2014/427045 (PMC4124836; doi:10.1155/2014/427045)
Supplement: Supplementary file 1 — Video 1: Rich collateral formations between left circumflex artery and right lung assumed as multiple fistulas Video 2: Chronic thrombotic occlusion of the proximal part of the inferior vena cava and collateral veins in both right and left sides, draining the lower limb veins through the azygos and hemiazygos veins to the right heart Video 3: Proximal occlusion of the right pulmonary artery. [file 427045.f1.zip]

Archive with 4 entries (3 files):
- 427045.f1/
- 427045.f1/Video 1.wmv
- 427045.f1/Video 2.wmv
- 427045.f1/Video 3.wmv
